# Supplementary material for: VvGRX28 interacting with VvZNF10 modulates cold tolerance via eliminating excessive ROS in grapevine
Source: Research Square preprint supplement (doi:10.21203/rs.3.rs-8260182/v1), 2025-12-15
Supplement: Supplementary file 1 [file 9e1d6c07bbee2e0b77e3a7e0.docx]

Table S1 RT-PCR, overexpression, RNAi, LCI and BiFC primer sequences used in this study

| Gene Name | Forward primer（5'-3'） | Reverse primer (5'-3') |
| --- | --- | --- |
| VvGRX1 | AGATGCGCTGCAAGAGAGTT | TTGAACCACTTGAGGGTCCG |
| VvGRX17 | GGGGCTTCAGGGTTATGGTT | TCTTCTGCTCCCCCGATGTA |
| VvGRX18 | ACCCTGAGCTGAAGATTGCT | ATCCCCCTATGAACTCCCCC |
| VvGRX19 | CAGAAGAGCCCAAGTGTGGA | CTTCTTCAACCCCTCGCGTA |
| VvGRX20 | CGCAGTGATTGTGTTCGGGA | GGTTCACACCCAGACCCAAC |
| VvGRX22 | TTCTCCAAGTCCTATTGCCCG | CAGTACGCCTTCCCACCATC |
| VvGRX23 | CGTCTGCGAAGTGAACGAAG | GCGGCCATGACTCTATCCAA |
| VvGRX25 | TGGCGGATTTTGGAAACAGC | GCACAGTCATAGAGCGACCA |
| VvGRX28 | CGTATTGTCCGTTCTGCGTG | CACGTTTGGCACAGTACGC |
| VvGRX32 | GTTTTGCGTGTCCTTTCGGG | TGGCTTCACCTTCTTTGGGG |
| VvGRX33 | ATCCGGTGCATCCCAAGAAG | CAGAAAGGGCAGGCTTCGTA |
| VvGAPDH | TTCTCGTTGAGGGCTATTCCA | CCACAGACTTCATCGGTGACA |
| AtICE1 | AGAAAGGGAAGAGAACGAGGAAGG | ATCTTGTGGATGTGGTTGGTTACTAC |
| AtCOR15A | ACAGCGGAGCCAAGCAGAG | GCGGCGTAGATCAACGACTTC |
| AtCBF1 | ACTCGGCTTGGCGGCTAC | GATTCGTGGTCGTCGTATCACAC |
| AtCBF2 | CAAGAAACCAGCGGGAAGGAAG | CTCTCAACTCACACACCCACTTAC |
| AtActin | AGCACTTGCACCAAGCAGCATG | ACGATTCCTGGACCTGCCTCATC |
| VvICE1 | GGAGGTAAGGGTAAGAGAAGGAAGG | GATGTCCAATCCAAGGTTGTCCAG |
| VvCOR413 | ATGTCGTCCCTTTCCATCTCCAC | TCAAATAAAGAGTAAGCATGACACT |
| VvCBF1 | AGAGGTCAGAGAAGGTTGGAGATG | GCAGGTGGAGTAAGGAGCAAAC |
| VvCBF2 | GATGGTTTCCCGACAGCGTTC | TAGCAGGTGGAGTAAGAAGCAGAC |
| GUS | GCTCTACACCACGCCGAACA | GCTCTACACCACGCCGAACA |
| Pro- VvGRX28 | CGTTCGTGTATGCCTAGCTGTC | CAAGATGCTATGGCTGATGAGAGTG |
| VvGRX28-EGFP | gagaacacgggggacgagctcATGGCGTTGCAAAAGGCC | caccatggtgtcgactctagaACAGGTAACAGAACTCCCTTCGTT |
| VvGRX28-RNAi-Forward segment | agaacacgggggactctagaATGGCGTTGCAAAAGGCC | ggggttcccccggggtcgacTCAACAGGTAACAGAACTCCCTTCG |
| VvGRX28-RNAi-Reverse segment | ggttcgaaatcgatggtaccTCAACAGGTAACAGAACTCCCTTCG | gatcggggaaattcgagctcATGGCGTTGCAAAAGGCC |
| VvZNF-Flag | tttggagaggacacgctcgagATGGAGCAGGCACGATTCTG | gtcatccttgtagtcgaattcCTTCACCTTTGGCCGTTCAC |
| VvGRX28-BD | aggccgaattcccggggatccttATGGCGTTGCAAAAGGCC | ccgctgcaggtcgacggatccttACAGGTAACAGAACTCCCTTCGTT |
| VvZNF10-AD | gccatggaggccagtgaattcATGGAGCAGGCACGATTCTG | cagctcgagctcgatggatccCTTCACCTTTGGCCGTTCAC |
| VvGRX28-mYCE | gagaacacgggggactctagatATGGCGTTGCAAAAGGCC | gtacatcccgggagcggtaccACAGGTAACAGAACTCCCTTCGTT |
| VvZNF10-mYNE | cccaggcctactagtggatccATGGAGCAGGCACGATTCTG | cgatcggggaaattcgagctcCTTCACCTTTGGCCGTTCAC |
| VvGRX28-nLUC | gagaacacgggggacgagctctATGGCGTTGCAAAAGGCC | tggcgcgccgggccctctagaACAGGTAACAGAACTCCCTTCGTT |
| VvZNF10-cLUC | tacgcgtcccggggcggtacctATGGAGCAGGCACGATTCTG | atacgaacgaaagctctgcagCTTCACCTTTGGCCGTTCAC |

Table S2 Physical and chemical properties analysis of *GRX* family genes in grape

| Gene Name | Gene ID | Amino acid  Number | Molecular Weight | Theoretical  pI | Instability  Index | Aliphatic Index | GRAVY | Subcellular Localization |
| --- | --- | --- | --- | --- | --- | --- | --- | --- |
| VvGRX1 | VIT_01s0010g01680.t01 | 546 | 62943.77 | 8.96 | 42.22 | 81.41 | -0.424 | cytoskeleton |
| VvGRX2 | VIT_01s0146g00220.t01 | 156 | 16968.69 | 8.4 | 46.66 | 86.99 | 0.112 | chloroplast |
| VvGRX3 | VIT_02s0025g01710.t01 | 378 | 42133.9 | 6.31 | 52.44 | 73.73 | -0.591 | cytoplasm |
| VvGRX4 | VIT_02s0025g02700.t01 | 309 | 33659.83 | 5.93 | 41.57 | 86.67 | -0.202 | cytoplasm |
| VvGRX5 | VIT_04s0008g01120.t01 | 137 | 14681.07 | 5.91 | 53.1 | 110.22 | 0.331 | cytoplasm |
| VvGRX6 | VIT_04s0023g02800.t01 | 128 | 14009.13 | 8.66 | 47.23 | 108.83 | 0.062 | chloroplast |
| VvGRX7 | VIT_05s0020g01750.t01 | 103 | 11350.32 | 8.49 | 44.88 | 93.69 | 0.106 | cytoplasm |
| VvGRX8 | VIT_05s0020g01760.t01 | 102 | 11155.14 | 9.15 | 39.82 | 88.92 | 0.076 | chloroplast |
| VvGRX9 | VIT_06s0004g07040.t01 | 246 | 27200.04 | 6.39 | 51.01 | 77.64 | -0.218 | chloroplast |
| VvGRX10 | VIT_07s0104g01390.t01 | 102 | 11061.92 | 6.7 | 42.84 | 102.16 | 0.133 | chloroplast |
| VvGRX11 | VIT_07s0104g01400.t01 | 222 | 25251.03 | 9.39 | 43.73 | 80.81 | -0.333 | cytoplasm |
| VvGRX12 | VIT_07s0104g01420.t01 | 106 | 11533.68 | 7.69 | 47.78 | 100.28 | 0.244 | nucleus |
| VvGRX13 | VIT_07s0005g04860.t01 | 178 | 19545.28 | 9.48 | 55.04 | 78.76 | -0.266 | mitochondrion |
| VvGRX14 | VIT_08s0032g01030.t01 | 303 | 34455.57 | 8.33 | 45.65 | 77.16 | -0.434 | cytoplasm |
| VvGRX15 | VIT_08s0105g00490.t01 | 297 | 32513.14 | 7.69 | 45.84 | 87.58 | -0.213 | chloroplast |
| VvGRX16 | VIT_08s0007g03220.t01 | 398 | 43828.67 | 8.68 | 59.79 | 84.22 | -0.407 | nucleus |
| VvGRX17 | VIT_08s0007g05530.t01 | 245 | 27589.45 | 7.92 | 55.27 | 75.92 | -0.464 | chloroplast |
| VvGRX18 | VIT_09s0002g06040.t01 | 170 | 18912.62 | 6.3 | 39.11 | 80.24 | -0.321 | mitochondrion |
| VvGRX19 | VIT_10s0597g00030.t01 | 492 | 54012.45 | 5.05 | 35.06 | 82.97 | -0.251 | nucleus |
| VvGRX20 | VIT_10s0003g00390.t01 | 150 | 15856.37 | 5.13 | 47.84 | 87 | 0.165 | cytoplasm |
| VvGRX21 | VIT_10s0003g03940.t01 | 179 | 19628.9 | 6.41 | 49.64 | 95.25 | 0.113 | mitochondrion |
| VvGRX22 | VIT_11s0052g00500.t01 | 136 | 14701.67 | 5.27 | 43.59 | 88.97 | -0.092 | extracellular |
| VvGRX23 | VIT_12s0028g03010.t01 | 141 | 15179.8 | 5.88 | 40.49 | 107.8 | 0.228 | chloroplast |
| VvGRX24 | VIT_13s0067g01650.t01 | 294 | 32628.62 | 9.22 | 40.11 | 74.52 | -0.249 | chloroplast |
| VvGRX25 | VIT_13s0019g00340.t01 | 268 | 30022.31 | 8.78 | 47.35 | 69.07 | -0.377 | chloroplast |
| VvGRX26 | VIT_13s0073g00520.t01 | 376 | 42202.98 | 5.21 | 35.31 | 76.7 | -0.532 | cytoplasm |
| VvGRX27 | VIT_14s0068g01570.t01 | 123 | 13460.76 | 6.27 | 54.25 | 93.5 | 0.171 | cytoplasm |
| VvGRX28 | VIT_14s0066g00960.t01 | 114 | 11807.43 | 5.19 | 39.46 | 87.19 | 0.15 | chloroplast |
| VvGRX29 | VIT_14s0108g00400.t01 | 450 | 50709.62 | 5.21 | 51.57 | 62.56 | -0.782 | mitochondrion |
| VvGRX30 | VIT_17s0000g02320.t01 | 275 | 30782.97 | 6.36 | 39.6 | 85.13 | -0.343 | chloroplast |
| VvGRX31 | VIT_17s0000g08670.t01 | 184 | 20150.09 | 6.17 | 36.55 | 81.52 | -0.203 | chloroplast |
| VvGRX32 | VIT_18s0001g04600.t01 | 600 | 68051.8 | 5.6 | 46.41 | 92.1 | -0.342 | cytoplasm |
| VvGRX33 | VIT_18s0001g14730.t01 | 322 | 35966.46 | 9.31 | 37.73 | 91.46 | -0.248 | chloroplast |
