# Supplementary material for: VvGRX28 interacting with VvZNF10 modulates cold tolerance via eliminating excessive ROS in grapevine
Source: Research Square preprint supplement (doi:10.21203/rs.3.rs-8260182/v1), 2025-12-15
Supplement: Supplementary file 2 [file a2d825a1a2fcb2d414d7be1d.docx]

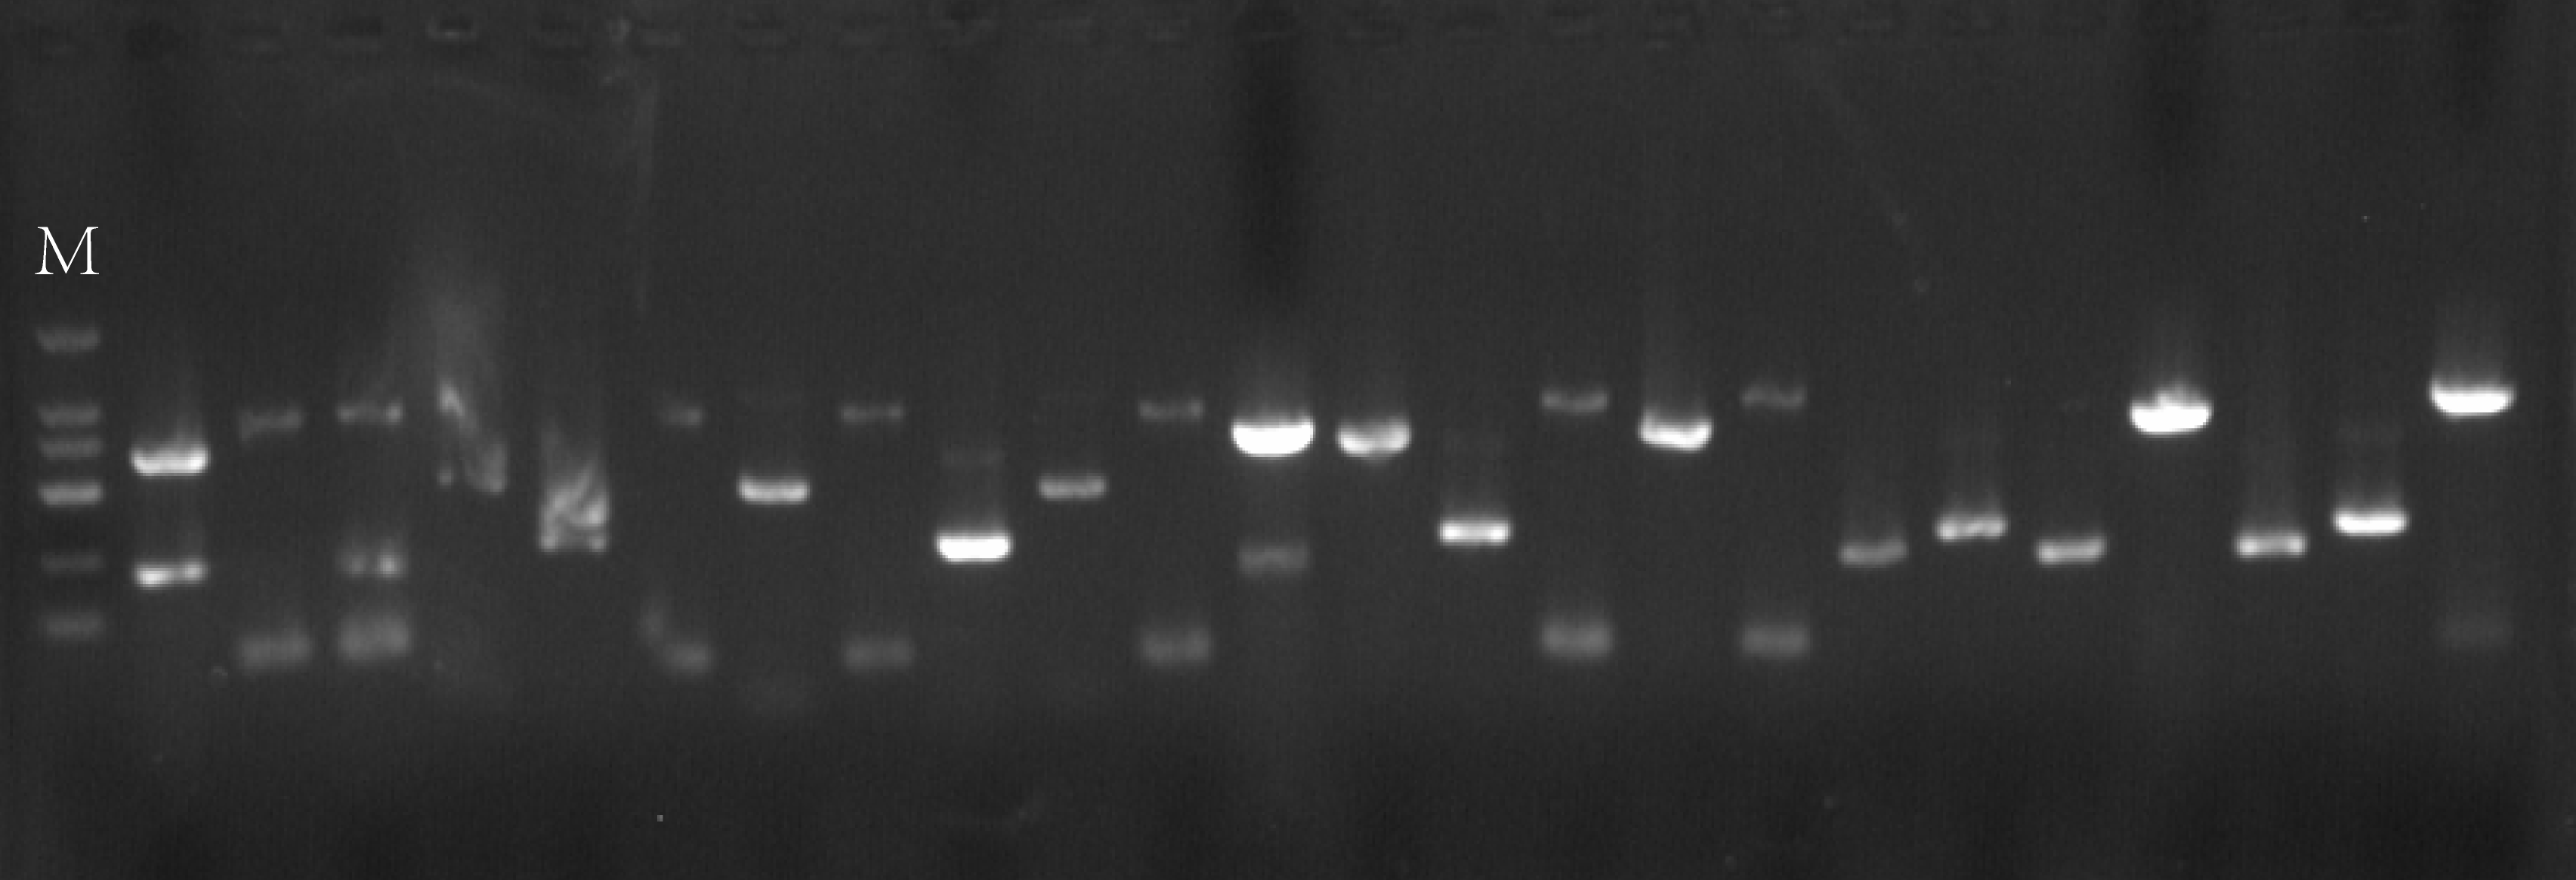

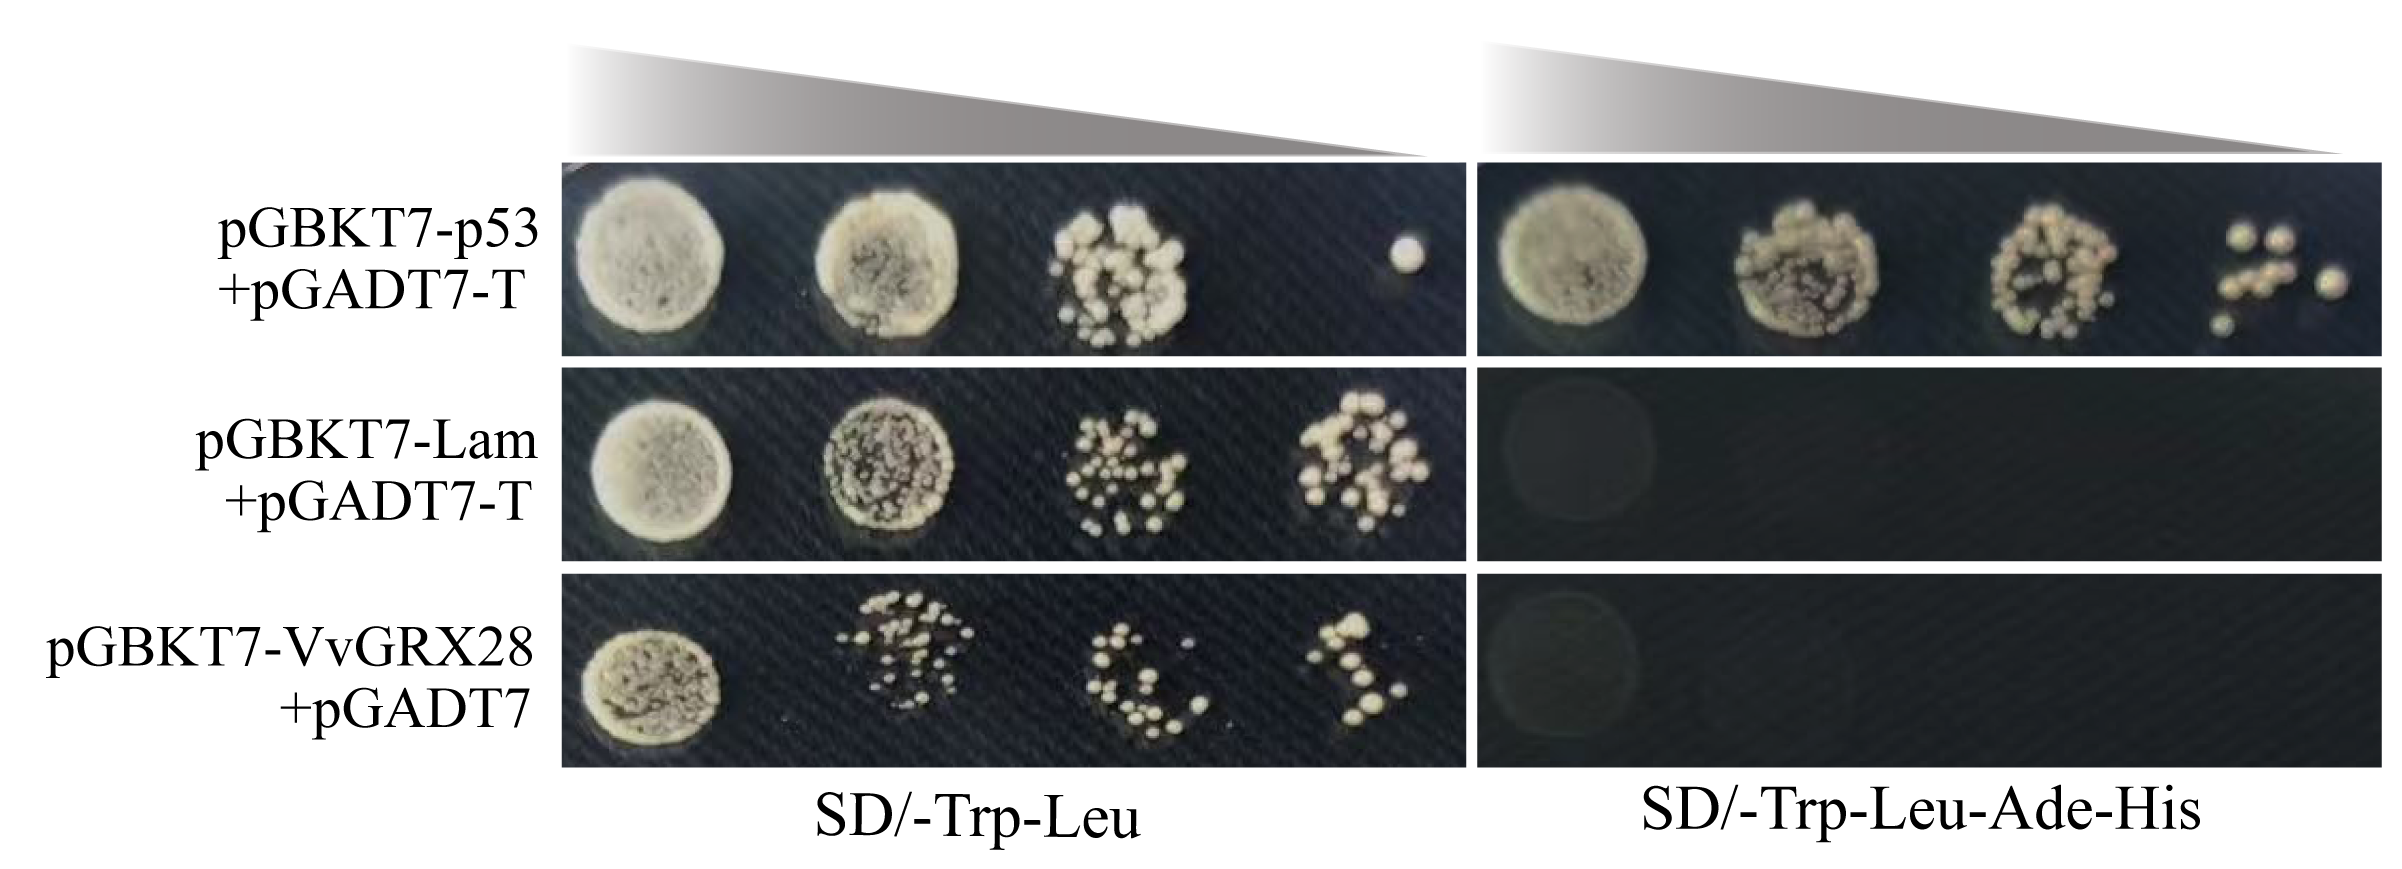
**Fig.S1.** Thedetection of self-activating toxicity detection on pGBKT7-VvGRX28. The recombinant bait and pGADT7 empty vector plasmids were co-transformed into Y2HGold strain in SD/-Leu/-Trp and SD/-Leu/-Trp/-His/-Ade to detect self-activating toxicity. They grow normally in SD/-Leu/-Trp while can’t grow in SD/-Leu/-Trp/-His/-Ade, the result represents VvGRX28 hadn’t self-activating toxicity. pGBKT7-p53 + pGADT7-T and pGBKT7-Lam + pGADT7-T were used as positive and negative controls, respectively.


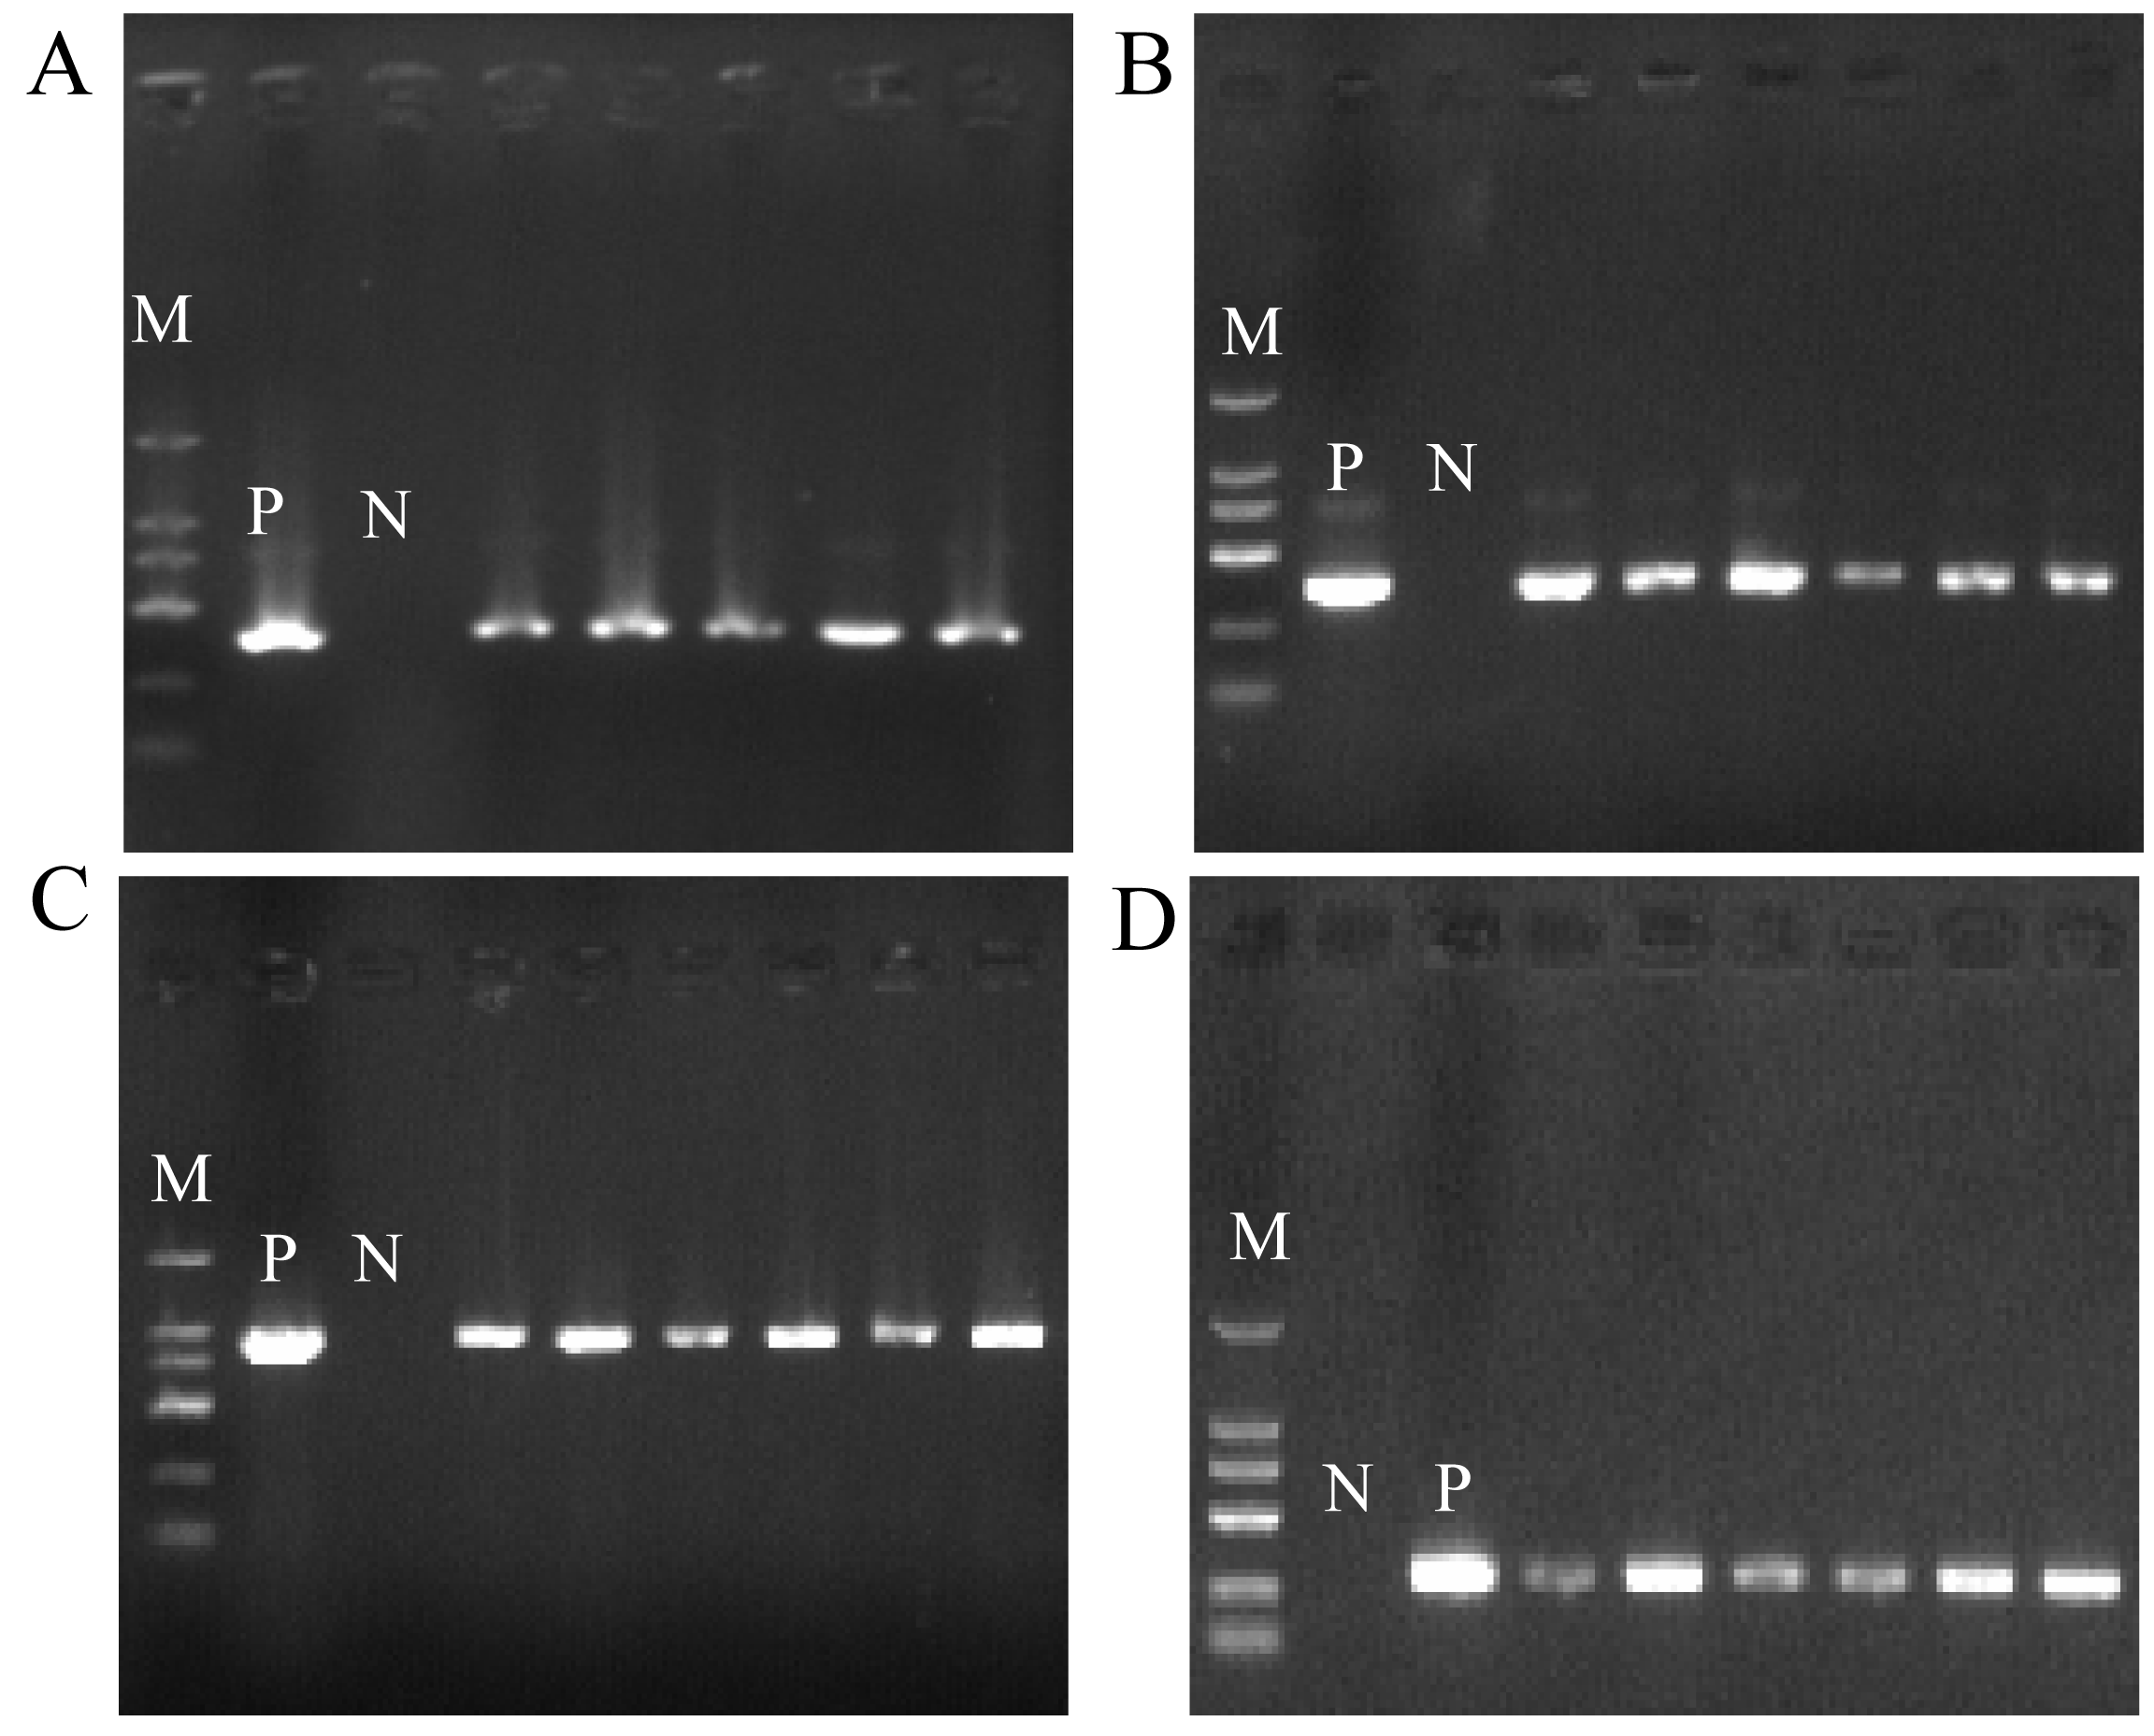
**Fig.S2.** PCR amplification after mating hybridization screening. PCR products were used to sequence, then blasted in NCBI to gain potential interaction proteins.

**Fig.S3.** The identification of transgenic *Arabidopsis thalianas* and grape callus by PCR amplification. (A) Overexpression *VvGRX28* in *Arabidopsis thalianas*. (B) Overexpression *VvGRX28* in grape callus. (C) Overexpression *VvZNF10* in co-transformation callus. (D) RNAi *VvGRX28* in in co-transformation callus. DNA marker was 2000 bp., stable expression calluses and *Arabidopsis thalianas* were used to verify cold function.
